# Supplementary material for: A longitudinal circulating tumor DNA-based model associated with survival in metastatic non-small-cell lung cancer
Source: PubMed Central journal article supplement (PMC10115641; doi:10.1038/s41591-023-02226-6), 2023-03-16
Supplement: 41591_2023_2226_MOESM1_ESM.pdf [file 41591_2023_2226_MOESM1_ESM.pdf]

## Reporting Summary

Nature Portfolio wishes to improve the reproducibility of the work that we publish. This form provides structure for consistency and transparency in reporting. For further information on Nature Portfolio policies, see our [Editorial Policies](#) and the [Editorial Policy Checklist](#).

### Statistics

For all statistical analyses, confirm that the following items are present in the figure legend, table legend, main text, or Methods section.

n/a Confirmed

- The exact sample size ( $n$ ) for each experimental group/condition, given as a discrete number and unit of measurement
- A statement on whether measurements were taken from distinct samples or whether the same sample was measured repeatedly
- The statistical test(s) used AND whether they are one- or two-sided  
*Only common tests should be described solely by name; describe more complex techniques in the Methods section.*
- A description of all covariates tested
- A description of any assumptions or corrections, such as tests of normality and adjustment for multiple comparisons
- A full description of the statistical parameters including central tendency (e.g. means) or other basic estimates (e.g. regression coefficient) AND variation (e.g. standard deviation) or associated estimates of uncertainty (e.g. confidence intervals)
- For null hypothesis testing, the test statistic (e.g.  $F$ ,  $t$ ,  $r$ ) with confidence intervals, effect sizes, degrees of freedom and  $P$  value noted  
*Give  $P$  values as exact values whenever suitable.*
- For Bayesian analysis, information on the choice of priors and Markov chain Monte Carlo settings
- For hierarchical and complex designs, identification of the appropriate level for tests and full reporting of outcomes
- Estimates of effect sizes (e.g. Cohen's  $d$ , Pearson's  $r$ ), indicating how they were calculated

*Our web collection on [statistics for biologists](#) contains articles on many of the points above.*

### Software and code

Policy information about [availability of computer code](#)

Data collection

No software used for data collection

Data analysis

All statistical analyses were performed in R (<https://www.R-project.org/>), version 3.6. R libraries included Hmisc (version 4.7), glmnet (v3.0-2), randomForestSRC (v 2.9.3). Code is deposited in a public repository (EGAS00001006703) and the link is in the Code Availability statement of the manuscript.

For manuscripts utilizing custom algorithms or software that are central to the research but not yet described in published literature, software must be made available to editors and reviewers. We strongly encourage code deposition in a community repository (e.g. GitHub). See the Nature Portfolio [guidelines for submitting code & software](#) for further information.

### Data

Policy information about [availability of data](#)

All manuscripts must include a [data availability statement](#). This statement should provide the following information, where applicable:

- Accession codes, unique identifiers, or web links for publicly available datasets
- A description of any restrictions on data availability
- For clinical datasets or third party data, please ensure that the statement adheres to our [policy](#)

Public datasets that were used during data processing included ExAC database (<http://exac.broadinstitute.org/>) and IDs from COSMIC database (<https://cancer.sanger.ac.uk/cosmic>).

The data and code required to reproduce results are deposited to the European Genome-Phenome Archive under accession number EGAS00001006703, and can be made available upon request. Qualified researchers may request access to individual patient-level data through the clinical study data request platform (<https://vivli.org/>). Further details on Roche's criteria for eligible studies are available at <https://vivli.org/members/ourmembers>. For further details on Roche's Global Policy on the Sharing of Clinical Information and how to request access to related clinical study documents, see [https://www.roche.com/research\\_and\\_development/who\\_we\\_are\\_how\\_we\\_work/clinical\\_trials/our\\_commitment\\_to\\_data\\_sharing.htm](https://www.roche.com/research_and_development/who_we_are_how_we_work/clinical_trials/our_commitment_to_data_sharing.htm).

## Human research participants

Policy information about [studies involving human research participants and Sex and Gender in Research](#).

### Reporting on sex and gender

Gender was not collected in this study, and accordingly we do not use this term in the paper. Please refer to Extended Data Tables 1 and 2 for covariate-relevant population characteristics of the human research participants in the IMpower150 ctDNA study, which includes Sex.

### Population characteristics

Patient metadata are included in the manuscript, including tables of population characteristics for both the full IMpower150 population and this retrospective exploratory ctDNA substudy reported in this manuscript (Supp Table ST1). Briefly, IMpower150 patients had stage IV or recurrent metastatic nonsquamous NSCLC for which they had not previously received chemotherapy, a baseline Eastern Cooperative Oncology Group (ECOG) performance-status score of 0 or 1, and tumor tissue available for biomarker testing and if they were eligible to receive bevacizumab; patients with any PD-L1 immunohistochemistry status were eligible. Please refer to Extended Data Tables 1 and 2 for covariate-relevant population characteristics of the human research participants in the IMpower150 ctDNA study, including baseline ECOG score, Age, Sex, Tobacco use, Race, Region, Number of metastatic sites, and PDL1 status.

### Recruitment

In the IMpower150 study patients were eligible for inclusion in this retrospective exploratory ctDNA substudy reported in this manuscript if they had plasma samples available for ctDNA testing at both baseline and an early on-treatment timepoint (either cycle 2 day 1 or cycle 3 day 1), as well as PBMCs available in order to perform germline subtraction. This reduced the number of patients in this ctDNA substudy to 466. We expected a survivorship bias in this ctDNA-evaluable population due to our requirement for patients to have samples available after randomization, and while no strong PFS bias was found for ctDNA evaluable versus non-evaluable (HR=0.92 [0.82-1.05]), we did detect a survivorship bias for OS (HR=0.86 [0.75 – 0.99]) (Extended Data Figure ED1a). However, baseline characteristics were similar between the full IMpower150 and ctDNA evaluable population, including baseline ECOG, age, sex, race, region, among others (Supplementary Table ST1). We do not expect this OS survivorship to strongly impact our results, because this exploratory ctDNA substudy is concerned with building ctDNA-based models to predict overall survival, and typically patients who do not have evaluable on-treatment samples available are those who unfortunately had very rapid disease progression, and therefore for which a ctDNA model to predict survival is of limited utility.

### Ethics oversight

The study was conducted in accordance with the International Conference on Harmonisation Good Clinical Practice guidelines and with the principles of the Declaration of Helsinki. All patients provided written informed consent, and the protocol was approved by independent ethics committees at each participating site. The study protocol is in the appendix of the primary clinical manuscript for IMpower150 (Socinski et al, NEJM 2018) and can also be found at <https://clinicaltrials.gov/ct2/show/NCT02366143>.

There are 161 institutes/organizations whose ethical committees approved the protocol, including:

- [1] "Copernicus Group Independent Review Board"
- [2] "Western Institutional Review Board"
- [3] "Melbourne Health Human Research Ethics Committee"
- [4] "Tasmania Health and Medical Human Research Ethics Committee"
- [5] "Asociacion Benefica Prisma"
- [6] "Comité Institucional de ética en Investigación Instituto Nacional de Enfermedades Neoplásicas"
- [7] "Singhealth Centralised Institutional Review Board"
- [8] "Institutional Review Board Kaohsiung Medical University Chung-Ho Memorial Hospital"
- [9] "Institutional Review Board Taipei Veterans General Hospital"
- [10] "Institutional Review Board"
- [11] "Institutional Review Board of the Chi Mei Medical Center"
- [12] "The Institutional Review Board of Taichung Veterans General Hospital"
- [13] "Institutional Review Board of Tri-Service General Hospital"
- [14] "Cheng-Hsin General Hospital Institutional Review Board"
- [15] "Consejo de Evaluación Ética de Investigación en Salud - CoEIS"
- [16] "Ministerio de Salud - Provincia de Río Negro"
- [17] "Comité Independiente de Ética en investigación clínica \"Dr. Carlos A. Barclay"
- [18] "Comité de ética en investigación Fundación Oncosalud"
- [19] "Comisión Conjunta de Investigación en Salud (CCIS)"
- [20] "Comité de Ética Centro de Oncología e Investigación Buenos Aires"
- [21] "Comité de Ética Independiente - Fundación Sanatorio"
- [22] "Institutional Review Board of Chang Gung Medical Foundation"
- [23] "Ethikkommission für das Bundesland Salzburg"
- [24] "The Ethics Committee for Clinical Trials of Medicinal Products"
- [25] "Chesapeake Institutional Review Board"
- [26] "St. Luke's Hospital & Health Network IRB"
- [27] "St Charles Medical Center"
- [28] "Saint Luke's Hospital Institutional Review Board"
- [29] "Kantonale Ethikkommission Bern (KEK)"
- [30] "Comite de Etica Cientifico del Servicio de Salud Metropolitano Norte"
- [31] "Comitato Etico Area Vasta Nord Ovest presso Azienda Ospedaliero Universitaria Pisana di Pisa"

- [32] "Comitato Etico Cardarelli-Santobono"
- [33] "Comitato Etico San Martino IST 2"
- [34] "Comitato Etico Lazio 1"
- [35] "COMITATO ETICO DELL'UNIVERSITA' CAMPUS BIO-MEDICO DI ROMA"
- [36] "Medical Research Ethics Committees United"
- [37] "CPP Sud-Méditerranée 2"
- [38] "Sir Charles Gairdner Hospital HREC"
- [39] "Bellberry Human Research Ethics Committee"
- [40] "Cabrini Human Research Ethics Committee"
- [41] "Comitato Etico Catania 1 presso A.O. Universitaria Policlinico Vittorio Emanuele di Catania"
- [42] "Comissão de Ética para a Investigação Clínica - CEIC"
- [43] "Ethikkommission an der Universität Regensburg"
- [44] "Ethikkommission an der Universität Regensburg"
- [45] "Lakeridge Health REB"
- [46] "St. Joseph Mercy Health System Institutional Review Board #2 - Oncology Central IRB"
- [47] "Mercy Saint Vincent Medical Center Institutional Review Board"
- [48] "US Oncology Inc. Institutional Review Board"
- [49] "Western Institutional Review Board (WIRB)"
- [50] "CEIC de la Corporacion Sanitaria del Parc Tauli"
- [51] "CEIC de Cantabria"
- [52] "CEIC de Andalucia (CCEIBA)"
- [53] "CEIC Hospital Universitario La Paz"
- [54] "CEIC Fundación Jiménez Díaz"
- [55] "CEIC Hospital Clínico Universitario de Valencia"
- [56] "CEIC Hospital General Universitario Gregorio Marañón"
- [57] "CEIC Hospital Clinico San Carlos"
- [58] "CEIC Grupo Hospital de Madrid"
- [59] "CEIC Parc de Salut Mar"
- [60] "CEIC Islas Baleares (CEIC-IB)"
- [61] "CEIC de Galicia (CAEI)"
- [62] "CEIC Hospital Clinic de Barcelona"
- [63] "Kaiser Permanente Southern California Institutional Review Board"
- [64] "Research Ethics Committee of National Taiwan University Hospital"
- [65] "Institutional Review Board of Chung Shan Medical University Hospital"
- [66] "CHU de Liège - Comité d'Ethique"
- [67] "CEQ of MI Kryvyi Rih Oncology Dispensary of Dnipropetrovsk Regional Council"
- [68] "CEQ of Treatment and Prevention Institution Volyn Regional Oncology Dispensary"
- [69] "CEQ of MI Dnipropetrovsk City Multifield Clinical Hospital #4 of Dnipropetrovsk Regional Council"
- [70] "CEQ of Poltava Regional Clinical Oncology Dispensary of Poltava Regional Council"
- [71] "Commission on Ethics Questions of Uzhgorod Central City Clinical Hospital"
- [72] "Commission of Ethics Questions on the basis of the Chernivtsi Regional Clinical Oncology Dispensary"
- [73] "CEQ of MI of Zaporizhzhia Regional Council Zaporizhzhia Regional Clinical Oncology Dispensary"
- [74] "CEQ of Transcarpathian Regional Clinical Oncology Dispensary"
- [75] "CEQ of SI Institute of Medical Radiology n.a. S.P. Hryhoriev of NAMS of Ukraine"
- [76] "CEQ of Municipal Noncommercial Institution Regional Center of Oncology"
- [77] "CEQ of Regional Municipal Institution Sumy Regional Clinical Oncology Dispensary"
- [78] "Comitato Etico Azienda Ospedaliera Universitaria Maggiore della Carità"
- [79] "Comitato Etico Dell Universita Cattolica del Sacro Cuore Policlinico Universitario Agostino Gemelli"
- [80] "Comité de Ética em Pesquisa em Seres Humanos da Faculdade de Medicina de São José do Rio Preto"
- [81] "Comitê de Ética em Pesquisa em Seres Humanos do Hospital Socor"
- [82] "Comitê de Ética em Pesquisa em Seres Humanos da Universidade de Ribeirão Preto (UNAERP)"
- [83] "Comitê de Ética em Pesquisa em Seres Humanos da Irmandade da Santa Casa de Londrina"
- [84] "Comitê de Ética em Pesquisa em Seres Humanos da Liga Norte Riograndense Contra o Câncer"
- [85] "Comitê de Ética em Pesquisa Fundação Pio XII Hospital de Câncer de Barretos"
- [86] "Comité de Ética en Investigación de la Facultad de Medicina y Hospital Universitario"
- [87] "Missouri Baptist Medical Center Institutional Review Board"
- [88] "University of California Irvine Institutional Review Board"
- [89] "University of California"
- [90] "Frederick Memorial Hospital Institutional Review Board"
- [91] "Mercy Medical Center IRB"
- [92] "University of Chicago Hospitals Institutional Review Board"
- [93] "Mount Sinai Medical Center IRB"
- [94] "Comité Provincial de Bioética - Ministerio de Salud de la Provincia de Santa Fé"
- [95] "Comite de Etica Investigacion de la Clinica Bajío"
- [96] "Comite de Etica en Investigacion de Mexico Centre for Clinical Research SA de CV"
- [97] "Comitê de Ética em Pesquisa da Universidade de Caxias do Sul"
- [98] "Comitê de Ética em Pesquisa do Hospital de Clínicas de Porto Alegre"
- [99] "Comite de Etica em Pesquisa da Universidade Federal de Sao Paulo - Hospital Sao Paulo"
- [100] "Comitê de Ética em Pesquisa - Hospital Mãe de Deus"
- [101] "Comitê de Ética em Pesquisa da Fundação Antônio Prudente – Hospital do Câncer A. C. Camargo"
- [102] "Ethics Committee for Multi-Centre Trials"
- [103] "Ethics Committee at Clinical Oncology Dispensary"
- [104] "Ethics Committee at City Clinical oncologic dispensary"
- [105] "Ethics Committee at Russian Oncology Research Center n.a. N.N.Blokhin"
- [106] "Ethics Committee at Moscow City Oncology Hospital #62 of Moscow Healthcare Department"
- [107] "Ethics Committee at Volzhskiy regional clinical oncology dispensary #3"

- [108] "CEQ of Ivano-Frankivsk Regional Oncology Dispensary"
- [109] "CEIC Hospital Universitario Insular Materno-Infantil de Las Palmas"
- [110] "CEIC Hospital Universitari Vall d'Hebron"
- [111] "CEIC Hospital Universitario Ramon y Cajal"
- [112] "CEIC Hospital Universitario 12 de Octubre"
- [113] "Eticka komisia Presovskeho samospravného kraja"
- [114] "Eticka komisia Univerzity nemocnica Bratislava"
- [115] "Lithuanian Bioethics Committee"
- [116] "CEIC Hospital Universitari de Bellvitge"
- [117] "Eticka komisia pri Narodnom onkologickom ustave"
- [118] "WIRB Copernicus Group"
- [119] "Kaiser Permanente of Colorado Institutional Review Board"
- [120] "Ethics Committee at Russian Medical Military Academy n.a. S.M.Kirov"
- [121] "Comite de Etica en Investigacion del Instituto Regional de Enfermedades Neoplasicas"
- [122] "National Cheng Kung University Hospital Human Experiment and Ethic Committee"
- [123] "Houston Methodist Research Institute IRB"
- [124] "Ingalls Memorial Hospital IRB"
- [125] "Rush University Medical Center Institutional Review Board"
- [126] "Mercy Health Springfield Communities Institutional Review Board"
- [127] "Mayo Clinic Institutional Review Board"
- [128] "Salus IRB"
- [129] "Mackay Memorial Hospital Institutional Review Board"
- [130] "Commission on Ethics Questions of Vinnytsya Regional Clinical Oncology Dispensary"
- [131] "Comite Etico Cientifico Clinica Santa Maria"
- [132] "BRANY IRB"
- [133] "Yale University Human Research Protection Program"
- [134] "Maimonides Med Ctr Institutional Review Board"
- [135] "Scripps Health Institutional Review Board"
- [136] "University of Texas Health Science Center San Antonio Institutional Review Board"
- [137] "Park Nicollet Institute Institutional Review Board"
- [138] "Eticka komisia NsP Sv. Jakuba"
- [139] "Ethikkommission der Bayerischen Landesärztekammer"
- [140] "CEQ of Kyiv City Clinical Oncological Center"
- [141] "The Institutional Review Board of China Medical University Hospital"
- [142] "Ethics Committee at Private Medical Institution \"Evromedservis\""
- [143] "Comitato di Bioetica dell'AUSL 1 di Sassari"
- [144] "Eticka komisia Onkologicky ustav sv. Alzbety"
- [145] "Ethics Committee at Railway Clinical Hospital JSC RZhD"
- [146] "Sault Area Hospital Research Ethics Board"
- [147] "Toranomon Hospital and Toranomon Hospital Kajigaya IRB"
- [148] "Kitasato University Sagamihara IRB"
- [149] "Niigata Cancer Center Hospital IRB"
- [150] "Kyoto University Hospital IRB"
- [151] "Osaka City University Hospital IRB"
- [152] "National Hospital Organization Toneyama National Hospital IRB"
- [153] "Wakayama Medical University IRB"
- [154] "Kurume University IRB"
- [155] "National Hospital Organization Kyushu Cancer Center"
- [156] "Kanagawa Cardiovascular and Respiratory Center IRB"
- [157] "National Hospital Organization Kyushu Medical Center IRB"
- [158] "National Hospital Organization Shikoku Cancer Center IRB"
- [159] "Miyagi Cancer Center IRB"
- [160] "Kyorin University Hospital IRB"
- [161] "Center Hospital of the National Center for Global Health and Medicine IRB"

Note that full information on the approval of the study protocol must also be provided in the manuscript.

## Field-specific reporting

Please select the one below that is the best fit for your research. If you are not sure, read the appropriate sections before making your selection.

Life sciences       Behavioural & social sciences       Ecological, evolutionary & environmental sciences

For a reference copy of the document with all sections, see [nature.com/documents/nr-reporting-summary-flat.pdf](https://www.nature.com/documents/nr-reporting-summary-flat.pdf)

## Life sciences study design

All studies must disclose on these points even when the disclosure is negative.

Sample size

Details on the IMpower150 study plan are published elsewhere. No sample size calculations were done for the ctDNA subsidy of IMpower150. The sample size was determined by the number of patients in IMpower150 (n=1201) which had baseline samples run on a 1.25 Mb ctDNA assay (n=1062), and those were subset to those patients with aliquots of C2D1 or C3D1 plasma available (n=910). 566 patients were then

randomly chosen for the ctDNA substudy, only 466 of which had PBMC available for CHIP/germline correction who were included in the final ctDNA analysis population.

**Data exclusions** Patients were excluded if they did not have baseline plasma and C2D1/C3D1 and PBMC available. Please refer to Figure 1 for sample flow diagram.

**Replication** Biomarkers measured in patient plasma samples were not replicated. Replication was not possible due to the limited patient samples available. The one experiment that had replication was during assay development in which 63 replicates were run to measure the concordance between the baseline assay and on-treatment assay. This experiment showed high concordance between the replicates ( $R^2=0.9961$ ; Supplementary Figure 1B right). No other experiments were replicated.

**Randomization** Details on the original IMpower150 study plan including randomization has been published elsewhere and can also be found at <https://clinicaltrials.gov/ct2/show/NCT02366143>. For this exploratory retrospective ctDNA substudy reported in this manuscript, the 466 ctDNA-evaluable patients were split into a training cohort and a testing cohort for model development. The training and test sets were initially chosen based on sequencing batch for the set of 566 patients chosen for the ctDNA substudy (see Figure 1a), where we put sequencing batch1 in training set and then added in patients from later batches to reach the target 50%/50% split. The sequencing lab decided which samples to include in batch 1 without any knowledge about the baseline characteristics, treatment, or clinical outcomes of the patients. We then checked for imbalances and it was found that RACE was not well distributed due to all Asian patients appearing in batch1, and so we moved half of the Asian patients to the test set and replaced these spots in the training data with a random set of patients. As the analysis progressed (in the training subset of data) we decided to add in PBMC correction due to concern over germline/CHIP variants contaminating the ctDNA dataset, which reduced the number of patients to those with PBMC available for correction, giving a final n of 466 patients and a final split of 240/226 patients for train/test. The final training/test sets were well balanced in clinical features and survival outcomes as can be seen in Supplementary Table ST2 and Extended Data Figure ED1f.

**Blinding** Details about blinding during arm allocation for the IMpower150 study itself can be found in the IMpower150 primary clinical manuscript or at <https://clinicaltrials.gov/ct2/show/NCT02366143>. For this retrospective exploratory ctDNA substudy, our model development analysis was not initiated until after samples were allocated to either the training or testing subgroup. The allocation of training/testing was not performed blinded, as the goal was to ensure that the training and testing subgroups were similar in baseline characteristics. Sample collection was performed prior to this retrospective analysis, and so investigators were blinded during sample collection. Data was generated by a diagnostic company separate from the analysts who performed the model development, and so data generation was also performed by blinded individuals.

## Reporting for specific materials, systems and methods

We require information from authors about some types of materials, experimental systems and methods used in many studies. Here, indicate whether each material, system or method listed is relevant to your study. If you are not sure if a list item applies to your research, read the appropriate section before selecting a response.

### Materials & experimental systems

### Methods

- n/a  Involved in the study
- Antibodies
- Eukaryotic cell lines
- Palaeontology and archaeology
- Animals and other organisms
- Clinical data
- Dual use research of concern

- n/a  Involved in the study
- ChIP-seq
- Flow cytometry
- MRI-based neuroimaging

### Antibodies

**Antibodies used** PD-L1 expression on tumor cells or tumor-infiltrating immune cells was analyzed in archival or freshly collected tumor tissue (or both) with the use of a PD-L1 immunohistochemistry assay (Ventana Medical Systems; clone SP142; catalog number N/A; pre-dilute ready to use antibody product at 36ug/5mL)

**Validation** Ventana PD-L1 (SP142) assay validation can be found at the following link: [https://www.accessdata.fda.gov/cdrh\\_docs/pdf16/p160002c.pdf](https://www.accessdata.fda.gov/cdrh_docs/pdf16/p160002c.pdf)

### Clinical data

Policy information about [clinical studies](#)

All manuscripts should comply with the ICMJE [guidelines for publication of clinical research](#) and a completed [CONSORT checklist](#) must be included with all submissions.

**Clinical trial registration** NCT02366143

**Study protocol** The protocol was published with the primary clinical manuscript and can be found here: [https://www.nejm.org/doi/suppl/10.1056/NEJMoa1716948/suppl\\_file/nejmoa1716948\\_protocol.pdf](https://www.nejm.org/doi/suppl/10.1056/NEJMoa1716948/suppl_file/nejmoa1716948_protocol.pdf)

Details of clinical data collection can be found in primary clinical manuscript for IMpower150. Briefly, IMpower150 data was collected between March 2015 and December 2019, patients from 26 countries or regions were enrolled at 240 sites. The list of 240 sites is the following:

United States, Arizona  
 Ironwood Cancer & Research Centers  
 Chandler, Arizona, United States, 85224  
 Arizona Oncology Associates  
 Flagstaff, Arizona, United States, 86001  
 United States, California  
 Southern CA Permanente Med Grp  
 Bellflower, California, United States  
 Marin Cancer Care Inc  
 Greenbrae, California, United States, 94904  
 Scripps Health  
 La Jolla, California, United States, 92037  
 Chao Family Comprehensive Cancer Center UCI  
 Orange, California, United States, 92868  
 United States, Colorado  
 Rocky Mountain Cancer Center  
 Denver, Colorado, United States, 80218  
 Kaiser Permanente  
 Lonetree, Colorado, United States, 80124  
 United States, Connecticut  
 Danbury Hospital  
 Danbury, Connecticut, United States, 06810  
 Yale Cancer Center  
 New Haven, Connecticut, United States, 06520  
 United States, Florida  
 Holy Cross Hospital Inc  
 Fort Lauderdale, Florida, United States, 33308  
 Cancer Specialists of North Florida - Baptist South  
 Jacksonville, Florida, United States, 32258  
 Mount Sinai Medical Center  
 Miami Beach, Florida, United States, 33140  
 Hematology Oncology Associates of the Treasure Coast  
 Port Saint Lucie, Florida, United States, 34952  
 United States, Georgia  
 Piedmont Cancer Institute, PC  
 Atlanta, Georgia, United States, 30318  
 United States, Illinois  
 Rush University Medical Center  
 Chicago, Illinois, United States, 60612  
 Univ of Chicago  
 Chicago, Illinois, United States, 60637  
 Ingalls Memorial Hospital  
 Harvey, Illinois, United States, 60426  
 Oncology Specialists, S.C.  
 Park Ridge, Illinois, United States, 60068  
 United States, Iowa  
 Hematology-Oncology; Associates of the Quad Cities  
 Bettendorf, Iowa, United States, 52722  
 United States, Kentucky  
 Norton Cancer Institute  
 Louisville, Kentucky, United States, 40202  
 United States, Maine  
 New England Cancer Specialists  
 Scarborough, Maine, United States, 04074  
 United States, Maryland  
 Mercy Medical Center  
 Baltimore, Maryland, United States, 21202  
 Regional Cancer Care Associates  
 Bethesda, Maryland, United States, 20817  
 Maryland Oncology Hematology, P.A.  
 Columbia, Maryland, United States, 21044  
 United States, Michigan  
 St. Joseph Mercy Health System  
 Ann Arbor, Michigan, United States, 48106  
 United States, Minnesota  
 St. Luke's Regional Cancer Center  
 Duluth, Minnesota, United States, 55805  
 Park Nicolett - Frauenshuh Cancer Center  
 Saint Louis Park, Minnesota, United States, 55426  
 United States, Missouri  
 St. Luke's Cancer Institute  
 Kansas City, Missouri, United States, 64111

Missouri Baptist Medical Center  
 Saint Louis, Missouri, United States, 63131  
 United States, Montana  
 Billings Clinic  
 Billings, Montana, United States, 59102  
 Montana Cancer Specialists  
 Missoula, Montana, United States, 59802  
 United States, Nevada  
 Comprehensive Cancer Centers of Nevada  
 Henderson, Nevada, United States, 89014  
 United States, New Jersey  
 Summit Medical Group  
 Berkeley Heights, New Jersey, United States, 07922  
 Valley Hospital; Oncology Research  
 Paramus, New Jersey, United States, 07652  
 Regional Cancer Care Associates LLC  
 Sewell, New Jersey, United States, 08080  
 United States, New York  
 Montefiore Medical Center  
 Bronx, New York, United States, 10467  
 Maimonides Medical Center  
 Brooklyn, New York, United States, 11219  
 United States, North Carolina  
 First Health of the Carolinas  
 Pinehurst, North Carolina, United States, 28374  
 United States, Ohio  
 University of Cincinnati  
 Cincinnati, Ohio, United States, 45203-0542  
 Mercy St Anne Hospital  
 Toledo, Ohio, United States, 43623  
 United States, Oregon  
 Bend Memorial Clinic  
 Bend, Oregon, United States, 97701  
 St. Charles Medical Center Bend; Cancer Care Of The Cascades  
 Bend, Oregon, United States, 97701  
 Willamette Valley Cancer Insitute and Research Center  
 Springfield, Oregon, United States, 97477  
 United States, Pennsylvania  
 St. Luke's Cancer Care Associates  
 Bethlehem, Pennsylvania, United States, 18015  
 Allegheny Cancer Center  
 Pittsburgh, Pennsylvania, United States, 15212  
 Univ of Pittsburgh Medical Ctr  
 Pittsburgh, Pennsylvania, United States, 15232  
 United States, Tennessee  
 West Clinic  
 Germantown, Tennessee, United States, 38138  
 Tennessee Cancer Specialists  
 Knoxville, Tennessee, United States, 37920  
 United States, Texas  
 Houston Methodist Cancer Center  
 Houston, Texas, United States, 77030  
 Longview Cancer Center  
 Longview, Texas, United States, 75601  
 University of Texas Health Science Center at San Antonio  
 San Antonio, Texas, United States, 78229  
 United States, Virginia  
 Virginia Cancer Specialists, PC  
 Fairfax, Virginia, United States, 22031  
 Virginia Oncology Associates  
 Norfolk, Virginia, United States, 23502  
 Virginia Cancer Institute  
 Richmond, Virginia, United States, 23226  
 Blue Ridge Cancer Care  
 Roanoke, Virginia, United States, 24014  
 United States, Washington  
 MultiCare Regional Cancer Center - Auburn  
 Auburn, Washington, United States, 98002-4117  
 Providence Regional Cancer Partnership  
 Everett, Washington, United States, 98201  
 Virginia Mason Medical Center  
 Seattle, Washington, United States, 98101  
 Medical Oncology Associates  
 Spokane, Washington, United States, 99208  
 United States, West Virginia  
 West Virginia University; Mary Babb Randolph Can Ctr

Morgantown, West Virginia, United States, 26506  
Argentina  
Centro Medico Austral  
Buenos Aires, Argentina, 1019  
Fundación CENIT para la Investigación en Neurociencias  
Buenos Aires, Argentina, C1125ABD  
Sanatorio Allende  
Cordoba, Argentina, X5000JHQ  
Centro Oncologico Riojano Integral (CORI)  
La Rioja, Argentina, F5300COE  
Hospital Provincial del Centenario  
Rosario, Argentina, 2000  
Fundacion Koriza  
Santa Rosa, Argentina, 6300  
Centro de Investigacion; Clinica - Clinica Viedma S.A.  
Viedma, Argentina, R8500ACE  
Australia, New South Wales  
Chris O'Brien Lifehouse  
Camperdown, New South Wales, Australia, 2050  
Concord Repatriation General Hospital  
Concord, New South Wales, Australia, 2139  
Nepean Cancer Care Centre  
Sydney, New South Wales, Australia, 2747  
Australia, Queensland  
Prince Charles Hospital; Department of Medical Oncology  
Chermside, Queensland, Australia, 4032  
Townsville Hospital  
Townsville, Queensland, Australia, 4810  
Princess Alexandra Hospital  
Woolloongabba, Queensland, Australia, 4102  
Australia, South Australia  
Royal Adelaide Hospital  
Adelaide, South Australia, Australia, 5000  
Adelaide Cancer Centre  
Kurralta Park, South Australia, Australia, 5037  
Australia, Tasmania  
Royal Hobart Hospital  
Hobart, Tasmania, Australia, 7000  
Launceston General Hospital  
Launceston, Tasmania, Australia, 7250  
Australia, Victoria  
Frankston Hospital  
Frankston, Victoria, Australia, 3199  
Austin Health  
Heidelberg, Victoria, Australia, 3084  
Cabrini Hospital Malvern  
Malvern, Victoria, Australia, 3144  
The Alfred Hospital  
Prahan, Victoria, Australia, 3181  
Sunshine Hospital  
St Albans, Victoria, Australia, 3021  
Australia, Western Australia  
Sir Charles Gairdner Hospital  
Nedlands, Western Australia, Australia, 6009  
Austria  
Paracelsus Medizinische Privatuniversität  
Salzburg, Austria, 5020  
Klinikum Wels-Grieskirchen  
Wels, Austria, 4600  
Belgium  
CHU de Liège  
Liège, Belgium, 4000  
Clinique Ste-Elisabeth  
Namur, Belgium, 5000  
Brazil  
CETUS Hospital Dia Oncologia  
Uberaba, MG, Brazil, 38082-049  
Instituto Do Cancer Delondrina\_X; Unidade De Pesquisa Clinica  
Londrina, PR, Brazil, 86 015 520  
Liga Norte Riograndense Contra O Câncer  
Natal, RN, Brazil, 59040150  
IPCEM; Instituto de Pesquisa de Estudos Multicêntricos  
Caxias do Sul, RS, Brazil, 95070-560  
Hospital Mae de Deus  
Porto Alegre, RS, Brazil, 90470-340  
Hospital de Cancer de Barretos



Barretos, SP, Brazil, 14784-400  
 Instituto Ribeirãopretano de Combate Ao Câncer; Centro Especializado De Oncologia  
 Ribeirão Preto, SP, Brazil, 14015-130  
 Hospital de Base de Sao Jose do Rio Preto  
 Sao Jose do Rio Preto, SP, Brazil, 15090-000  
 Hospital A. C. Camargo; Oncologia  
 Sao Paulo, SP, Brazil, 01509-010  
 Bulgaria  
 Multiprofile Hospital for Active Treatment Central Onco Hospital OOD  
 Plovdiv, Bulgaria, 4000  
 MHAT Serdika, EOOD  
 Sofia, Bulgaria, 1303  
 Canada, Ontario  
 Lakeridge Health Center  
 Oshawa, Ontario, Canada, L1J 2J2  
 Chile  
 Clinica Santa Maria  
 Santiago, Chile, 0  
 Health & Care SPA  
 Santiago, Chile, 7500006  
 Sociedad de Investigaciones Medicas Ltda (SIM)  
 Temuco, Chile, 4810469  
 France  
 Institut Bergonié Centre Régional de Lutte Contre Le Cancer de Bordeaux Et Sud Ouest  
 Bordeaux, France, 33076  
 CHU de Grenoble  
 Grenoble, France, 38043  
 Centre Jean Bernard Clinique Victor Hugo  
 Le Mans, France, 72015  
 Hôpital Saint Joseph  
 Marseille, France, 13008  
 Hopital Nord AP-HM  
 Marseille, France, 13015  
 Hôpital Européen Georges Pompidou  
 Paris, France, 75908  
 CHU de Bordeaux  
 Pessac, France, 33600  
 Service de Pneumologie Centre Hospitalier Régional La Réunion Site Felix Guyon  
 Saint Denis Cedex, France, 97405  
 CH de Saint Quentin  
 Saint Quentin, France, 2100  
 Centre Hospitalier Intercommunal Toulon - La Seyne sur Mer  
 Toulon, France, 83000  
 Hôpital d'Instruction des Armées de Sainte Anne; Service de Pneumologie  
 Toulon, France, 83000  
 Hôpital Larrey; Université Paul Sabatier  
 Toulouse, France, 31059  
 Germany  
 Zentralklinikum Augsburg  
 Augsburg, Germany, 86156  
 Helios Klinikum Emil von Behring GmbH  
 Berlin, Germany, 14165  
 Ev.Krankenhaus Bielefeld gGmbH; Klinik für Innere Medizin und Geriatrie  
 Bielefeld, Germany, 33611  
 Augusta Kranken-Anstalt gGmbH  
 Bochum, Germany, 44791  
 Universitätsklinikum "Carl Gustav Carus" der Technischen Universität Dresden  
 Dresden, Germany, 01307  
 St. Elisabethen Krankenhaus  
 Frankfurt am Main, Germany, 60487  
 LungenClinic Großhansdorf GmbH  
 Großhansdorf, Germany, 22927  
 Krankenhaus Martha-Maria; Halle-Dolau gGmbH  
 Halle, Germany, 06120  
 Asklepios Klinik Harburg  
 Hamburg, Germany, 21075  
 Lungenklinik Hemer  
 Hemer, Germany, 58675  
 Universität Des Saarlandes; Klinik für Innere Medizin V  
 Homburg, Germany, 66421  
 Kliniken der Stadt Koln gGmbH; Lungenklinik Onkologische Ambulanz  
 Koln, Germany, 51109  
 Klinik Loewenstein gGmbH; Onk & Pal  
 Loewenstein, Germany, 74245  
 Klinikum Bogenhausen  
 München, Germany, 81925

Krankenhaus Barmherzige Bruder Regensburg  
 Regensburg, Germany, 93049  
 Klinikum der Universität Regensburg  
 Regensburg, Germany, 93053  
 Stiftung Mathias-Spital Rheine  
 Rheine, Germany, 48431

Italy  
 AORN A Cardarelli  
 Napoli, Campania, Italy, 80131  
 Policlinico Universitario Campus Biomedico; Uoc Oncologia Medica  
 Roma, Lazio, Italy, 00128  
 Azienda Ospedaliera San Camillo Forlanini  
 Roma, Lazio, Italy, 00152  
 Università Cattolica Del S Cuore  
 Roma, Lazio, Italy, 00168  
 Istituto Nazionale per la Ricerca sul Cancro di Genova  
 Genova, Liguria, Italy, 16132  
 ASL 3 Genovese; DSM  
 Genova, Liguria, Italy, 16147  
 A.O.U. Maggiore della Carità  
 Novara, Piemonte, Italy, 28100  
 Azienda Unita Sanitaria Locale N1 Sassari; Unita Operativa Di Oncologia Medica  
 Sassari, Sardegna, Italy, 07100  
 Policlinico Vittorio Emanuele  
 Catania, Sicilia, Italy, 95123  
 Ospedale Versilia  
 Lido Di Camaiore, Toscana, Italy, 55043  
 Ospedale Civile - Livorno  
 Livorno, Toscana, Italy, 57124

Japan  
 National Hospital Organization Shikoku Cancer Center  
 Ehime, Japan, 791-0280  
 National Hospital Organization Kyushu Medical Center  
 Fukuoka, Japan, 810-8563  
 NHO Kyushu Cancer Center  
 Fukuoka, Japan, 811-1395  
 Kurume University Hospital  
 Fukuoka, Japan, 830-0011  
 Kanagawa Cardiovascular and Respiratory Center  
 Kanagawa, Japan, 236-0051  
 Kitasato University Hospital  
 Kanagawa, Japan, 252-0375  
 Kyoto University Hospital  
 Kyoto, Japan, 606-8507  
 Miyagi Cancer Center  
 Miyagi, Japan, 981-1293  
 Niigata Cancer Center Hospital  
 Niigata, Japan, 951-8566  
 Osaka City University Hospital  
 Osaka, Japan, 545-8586  
 National Hospital Organization Osaka Toneyama Medical Center  
 Osaka, Japan, 560-8552  
 Toranomon Hospital  
 Tokyo, Japan, 105-8470  
 Center Hospital of the National Center for Global Health and Medicine  
 Tokyo, Japan, 162-0052  
 Kyorin University Hospital  
 Tokyo, Japan, 181-8611  
 Wakayama Medical University Hospital  
 Wakayama, Japan, 641-8510

Latvia  
 Riga East Clinical University Hospital Latvian Oncology Centre  
 Riga, Latvia, LV-1079  
 Pauls Stradins Clinical University Hospital  
 Riga, Latvia, LV-1002

Lithuania  
 National Cancer Institute  
 Vilnius, Lithuania, 08660

Mexico  
 Centro Universitario Contra El Cancer  
 Monterrey, Mexico, 64020  
 Cancerologia de Queretaro  
 Queretaro, Mexico, 76090  
 Centro Hemato Oncologico Privado; Oncologia  
 Toluca, Mexico, 50080

Netherlands

Jeroen Bosch Ziekenhuis  
 'S Hertogenbosch, Netherlands, 5223 GZ  
 Amsterdam UMC Location VUMC  
 Amsterdam, Netherlands, 1081 HV  
 Amphia Ziekenhuis; Afdeling Longziekten  
 Breda, Netherlands, 4818 CK  
 Ziekenhuis Gelderse Vallei  
 EDE, Netherlands, 6716 RP  
 Tergooiziekenhuizen  
 Hilversum, Netherlands, 1201 DA  
 Spaarne Gasthuis; Spaarne Ziekenhuis  
 Hoofddorp, Netherlands, 2134 TM  
 Maastricht University Medical Center  
 Maastricht, Netherlands, 6229 HX  
 St. Antonius Ziekenhuis; R&D Long  
 Nieuwegein, Netherlands, 3435 CM  
 Erasmus MC; Afdeling Longziekten  
 Rotterdam, Netherlands, 3015 GD  
 Maasstad ziekenhuis  
 Rotterdam, Netherlands, 3079 DZ  
 Universitair Medisch Centrum Utrecht  
 Utrecht, Netherlands, 3584 CX  
 Gelre Ziekenhuizen, Zutphen  
 Zutphen, Netherlands, 7207 AE  
 Peru  
 Centro Medico Monte Carmelo  
 Arequipa, Peru, 04001  
 Centro Especializado de Enfermedades Neoplásicas  
 Arequipa, Peru  
 Instituto Nacional de Enfermedades Neoplasicas  
 Lima, Peru, Lima 34  
 Portugal  
 Centro Hospitalar E Universitário de Coimbra EPE  
 Coimbra, Portugal, 3000-602  
 Instituto Portugues Oncologia de Lisboa Francisco Gentil EPE  
 Lisboa, Portugal, 1099-023  
 Hospital Pulido Valente; Servico de Pneumologia  
 Lisboa, Portugal, 1796-001  
 Centro Hospitalar do Porto - Hospital de Santo António  
 Porto, Portugal, 4099-001  
 Instituto Portugues de Oncologia Do Porto Francisco Gentil Epe  
 Porto, Portugal, 4200-072  
 Hospital de Sao Joao; Servico de Pneumologia  
 Porto, Portugal, 4200  
 Russian Federation  
 Moscow City Oncology Hospital #62  
 Moskovskaya Oblast, Moskovskaja Oblast, Russian Federation, 143423  
 Russian Oncology Research Center n.a. N.N. Blokhin  
 Moscow, Russian Federation, 115478  
 Clinical Oncology Dispensary  
 Omsk, Russian Federation, 644013  
 Evromedservis LCC  
 Pushkin, Russian Federation, 196603  
 City Clinical Oncology Dispensary  
 Saint-Petersburg, Russian Federation, 197022  
 Singapore  
 National Cancer Centre; Medical Oncology  
 Singapore, Singapore, 169610  
 Slovakia  
 Univerzitna nemocnica Bratislava  
 Bratislava, Slovakia, 813 69  
 Narodny onkologicky ustav  
 Bratislava, Slovakia, 833 10  
 POKO Poprad s.r.o.  
 Poprad, Slovakia, 058 01  
 Spain  
 Instituto Catalan de Oncologia de Hospitalet (ICO); Servicio de Farmacia  
 L'Hospitalet de Llobregat, Barcelona, Spain, 08908  
 Corporacio Sanitaria Parc Tauli; Servicio de Oncologia  
 Sabadell, Barcelona, Spain, 8208  
 Hospital Universitario Marques de Valdecilla  
 Santander, Cantabria, Spain, 39008  
 Hospital Universitario Son Espases  
 Palma De Mallorca, Islas Baleares, Spain, 07014  
 Hospital Universitario Insular de Gran Canaria  
 Las Palmas de Gran Canaria, LAS Palmas, Spain, 35016

Complejo Hospitalario U. de Ourense  
 Ourense, Ourense, Spain, 32005  
 Hospital Lluís Alcanyis De Xativa  
 Xativa, Valencia, Spain, 46800  
 Hospital del Mar  
 Barcelona, Spain, 08003  
 Hospital Univ Vall d'Hebron; Servicio de Oncologia  
 Barcelona, Spain, 08035  
 Hospital Clinic de Barcelona  
 Barcelona, Spain, 08036  
 Hospital Universitario Reina Sofia  
 Cordoba, Spain, 14004  
 Hospital Lucus Augusti; Servicio de Oncologia  
 Lugo, Spain, 27003  
 Hospital General Universitario Gregorio Marañón; Servicio de Oncologia  
 Madrid, Spain, 28007  
 Hospital Universitario La Paz  
 Madrid, Spain, 280146  
 Hospital Ramon y Cajal; Servicio de Oncologia  
 Madrid, Spain, 28034  
 Hospital Clinico San Carlos; Servicio de Oncologia  
 Madrid, Spain, 28040  
 Hospital Universitario Fundación Jimenez Díaz  
 Madrid, Spain, 28040  
 Hospital Universitario 12 de Octubre  
 Madrid, Spain, 28041  
 Hospital Universitario HM Sanchinarro-CIOCC  
 Madrid, Spain, 28050  
 Hospital Clinico Universitario de Valencia  
 Valencia, Spain, 46010  
 Switzerland  
 Kantonsspital Baselland  
 Bruderholz, Switzerland, 4101  
 Luzerner Kantonsspital Sursee  
 Luzern, Switzerland, 6000  
 Kantonsspital St. Gallen; Onkologie/Hämatologie  
 St. Gallen, Switzerland, 9007  
 Taiwan  
 Changhua Christian Hospital; Hematology-Oncology  
 Changhua, Taiwan, 500  
 Kaohsiung Medical University Hospital; Department of Urology  
 Kaohsiung City, Taiwan, 807  
 Chi Mei Medical Center Liou Ying Campus  
 Liuying Township, Taiwan, 736  
 Chang Gung Memorial Hospital Chiayi  
 Putzu, Taiwan, 613  
 National Cheng Kung Univ Hosp  
 Tainan, Taiwan, 00704  
 National Taiwan Uni Hospital  
 Taipei City, Taiwan, 10041  
 Cheng Hsin General Hospital  
 Taipei, Taiwan, 112  
 Tri-Service General Hospital  
 Taipei, Taiwan, 11490  
 Chang Gung Medical Foundation Linkou Branch  
 Taoyuan City, Taiwan, 333  
 Taichung Veterans General Hospital  
 Xitun Dist., Taiwan, 40705  
 Ukraine  
 ME Bukovinian Clinical Oncology Center  
 Chernivtsi, Chernihiv Governorate, Ukraine, 58013  
 Municipal Institution City Clinical Hospital #4 of Dnipro City Council - PPDS; Dept of Chemotherapy  
 Dnipropetrovsk, Katerynoslav Governorate, Ukraine, 49102  
 Uzhgorod Central City Clinical Hospital  
 Uzhhorod, Katerynoslav Governorate, Ukraine, 88000  
 MNPE Zaporizhzhia Regional Antitumor Center ZRC  
 Zaporizhzhia, Katerynoslav Governorate, Ukraine, 69040  
 Communal Non profit Enterprise Regional Center of Oncology; Oncosurgical dept of thoracic organs  
 Kharkiv, Kharkiv Governorate, Ukraine, 61070  
 MNPE Transcarpathian Antitumor Center of the Transcarpathian Regional Council; Chemotherapy Dept  
 Uzhhorod, Kherson Governorate, Ukraine, 88014  
 Municipal Institution SubCarpathian Clinical Oncological Centre; Surgical department#2  
 Ivano-Frankivsk, KIEV Governorate, Ukraine, 76018  
 Communal Nonprofit Enterprise Podilsky Regional Center Of Oncology OfTheVinnytsia Regional Council  
 Vinnytsia, KIEV Governorate, Ukraine, 21029  
 SI Institute of Medical Radiology n.a. S.P. Hryhoriev of NAMS of Ukraine

Kharkiv, Ukraine, 61024  
ME Kryviy Rih Oncology Dispensary of Dnipropetrovs'k Regional Council; Chemotherapy Department  
Kryviy Rih, Ukraine, 50048  
Kyiv City Clinical Oncological Center  
Kyiv, Ukraine, 03115  
Poltava Regional Clinical Oncology Dispensary of Poltava Regional Council; Thoracic department  
Poltava, Ukraine, 36011  
Regional Municipal Institution Sumy Regional Clinical Oncology Dispensary  
Sumy, Ukraine, 40005

## Outcomes

The two primary end points of IMpower150 were progression-free survival (as assessed by investigators according to RECIST criteria) both among patients in the intention-to-treat population who had a wild-type genotype (WT population; patients with EGFR or ALK genomic alterations were excluded) and among patients in the WT population who had high expression of an effector T-cell (Teff) gene signature in the tumor (Teff-high WT population) and overall survival in the WT population. The ctDNA substudy also used the Overall Survival and radiographic response as assessed by RECIST v1.1. Additional details on the IMpower150 study can be found in the primary clinical manuscript.
